# Supplementary material
Source: Springer Nature journal article supplement (https://www.springermedizin.de/resource/supplementary/12885_2013_4337_MOESM6_ESM.pdf/9466880)

Fold change MDA-Exo vs. MCF-Exo

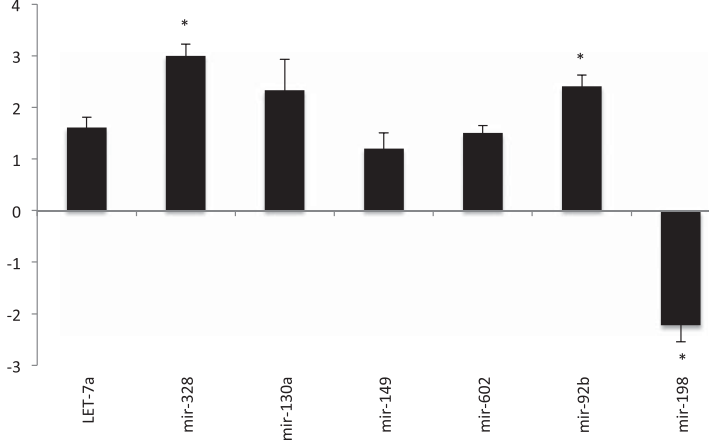

Supplement: MOESM6 [file 9466880]
